# Supplementary material for: Iron oxide nanostructures as highly efficient heterogeneous catalysts for mesoscopic photovoltaics
Source: Royal Society of Chemistry journal article supplement (doi:10.1039/c4ta03727h), 2014-01-01
Supplement: c4ta03727h1.pdf [file c4ta03727h1.pdf]

## Supporting Information

### Iron Oxide Nanostructures as Highly Efficient Heterogeneous Catalyst for Mesoscopic Photovoltaics

Liang Wang,<sup>a</sup> Yantao Shi,<sup>\*a</sup> Hong Zhang,<sup>a</sup> Xiaogong Bai,<sup>a</sup> Yanxiang Wang<sup>c</sup> and Tingli Ma<sup>\*ab</sup>

#### Preparation of heterogeneous flower-like Fe<sub>3</sub>O<sub>4</sub>

Preparation of Iron oxide precursor was performed according modified literature method.<sup>[1]</sup> Briefly, 25 mM (1.2g) FeCl<sub>3</sub>·6H<sub>2</sub>O (99.0%, AR, Aladdin, China), 250 mM (2.7g) urea (99.5%, RP, Sigma-aldrich), and 124 mM (7.2g) tetrabutylammonium bromide (99.0%, AR, Aladdin, China) were added to 180 mL ethylene glycol (99.0%, GC, Aladdin, China) in a 250 mL round flask. The red solution obtained was stirred with a magnetic stirrer bar and heated to 165 °C, a yellow precipitate began to appear and then the mixture turned yellow-green. The reaction was stopped and the mixture was cooled to room temperature immediately. The similar reaction has also been done and stopped at 175 °C, 185 °C and 195 °C, respectively. The dosage of reactants were decreased to 1/2 and 1/10 repeat above react at 195 °C. The precipitate was collected by suction filtration and washed with ethanol three times.

#### Preparation of CE

The paste of CE was prepared by dispersing 50 mg Iron oxide precursor in 3 mL isopropanol (99.5 %, AR, Aladdin, China). The obtained slurry was well-proportioned sprayed on fluorine tin oxide (FTO) glass substrate (Asahi Glass, Japan) using an airbrush (TD-128, Tiandi Co., Ltd) connected to a mini-compressor. By controlling sintered temperature and atmosphere, we can obtain different iron oxide CE listed in below: α-Fe<sub>2</sub>O<sub>3</sub> (450 °C, 3h under air), Fe<sub>3</sub>O<sub>4</sub> (450 °C, 3h under N<sub>2</sub>) and γ-Fe<sub>2</sub>O<sub>3</sub> (450 °C, 3h under N<sub>2</sub>, and then 250 °C, 5h under air).

#### Fabrication of DSCs

The TiO<sub>2</sub> photoanode are commercially available (Yingkou Opvtech New Energy Co., Ltd, China). They were sintered at 500 °C for 30 min. After cooling to 80 °C, the TiO<sub>2</sub> films were immersed in 5 x 10<sup>-4</sup> M solution of N719 dye (Ruthenizer 535-bis TBA, Solaronix SA, Switzerland) in ethanol (99.5%, anhydrous, Sigma-aldrich) for 20 h. The photoanode and CE sandwich electrolyte to form DSCs. The electrolytes were composed of 0.1 M LiI (99.99 %, anhydrous, Sigma-aldrich), 0.03 M I<sub>2</sub> (99.99 %, Sigma-aldrich), 0.1 M GuSCN (99 %, for molecular biology, Sigma-aldrich) and 0.5 M 4-tert-butylpyridine (96 %, Sigma-aldrich) in acetonitrile (99.8 %, anhydrous, Sigma-aldrich).

## Characterization

The X-ray diffraction experiments were carried out with an automatic X-ray powder diffractometer (D/Msx 2400, RIGAKU). The morphologies of  $\alpha$ - $\text{Fe}_2\text{O}_3$ ,  $\text{Fe}_3\text{O}_4$  and  $\gamma$ - $\text{Fe}_2\text{O}_3$  were observed using scanning electron microscopy (SEM, FEI QUANTA 450). Current-voltage curves of the DSCs were measured by a Keithley digital source meter (Keithley 2601, USA). The intensity of the incident light simulates an AM 1.5 solar light through a solar simulator (PEC-L15 Japan). The incident light intensity was calibrated using a silicon photocell (BS-520, Japan) and was set at  $100 \text{ mW cm}^{-2}$ . Cyclic voltammetry (CV) was carried out in a three-electrode system in an acetonitrile solution of  $0.1 \text{ M LiClO}_4$ ,  $10 \text{ mM LiI}$  and  $1 \text{ mM I}_2$  at a scan rate of  $10 \text{ mV s}^{-1}$  by using a electrochemical work station (CHI 630D). Pt served as a counter electrode and the  $\text{Ag}/\text{Ag}^+$  couple was used as a reference electrode. Tafel polarization measurements were carried out with a CHI 630D in a symmetric cell with a scan rate of  $50 \text{ mVs}^{-1}$ . The electrochemical impedance spectroscopy (EIS, Zenium Zahner, Germany) was actualized with above symmetric cell in the dark at an open circuit bias. The measured frequency ranged from  $100 \text{ mHz}$  to  $1\text{MHz}$ , and the AC amplitude was set at  $10 \text{ mV}$ .

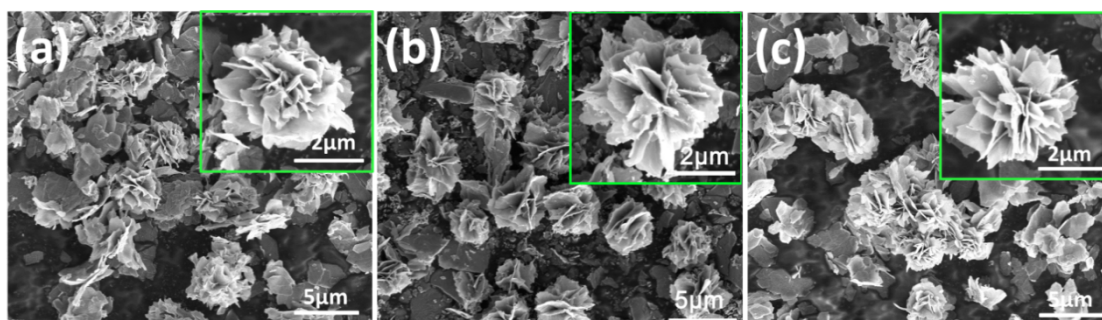

Figure S1. The SEM images of flower-like (a)  $\alpha$ - $\text{Fe}_2\text{O}_3$ , (b)  $\text{Fe}_3\text{O}_4$  and (c)  $\gamma$ - $\text{Fe}_2\text{O}_3$

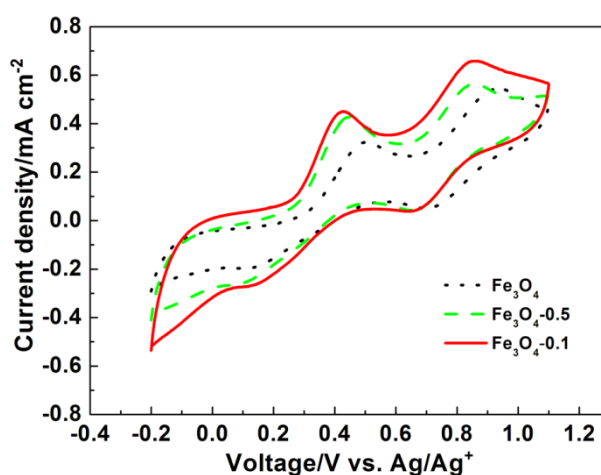

Figure S2. The CV curves of flower-like  $\text{Fe}_3\text{O}_4$  based on different dosage of reactants

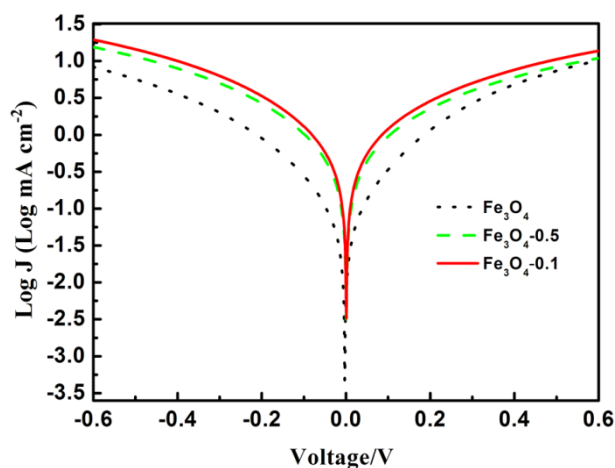

Figure S3. The Tafel curves of flower-like  $\text{Fe}_3\text{O}_4$  based on different dosage of reactants

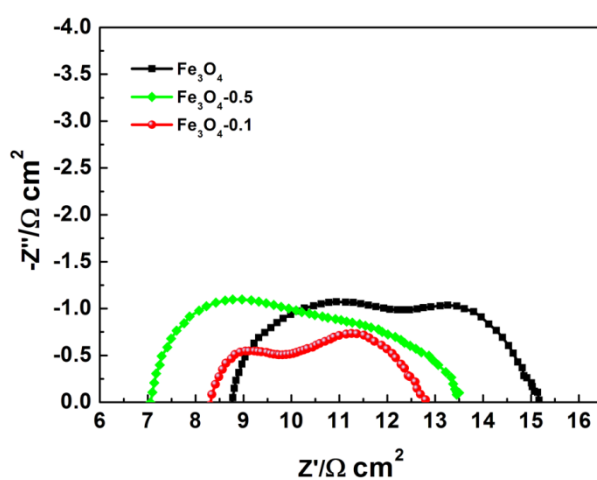

Figure S4. The Nyquist plots of flower-like  $\text{Fe}_3\text{O}_4$  based on different dosage of reactants. Insert: Equivalent circuit

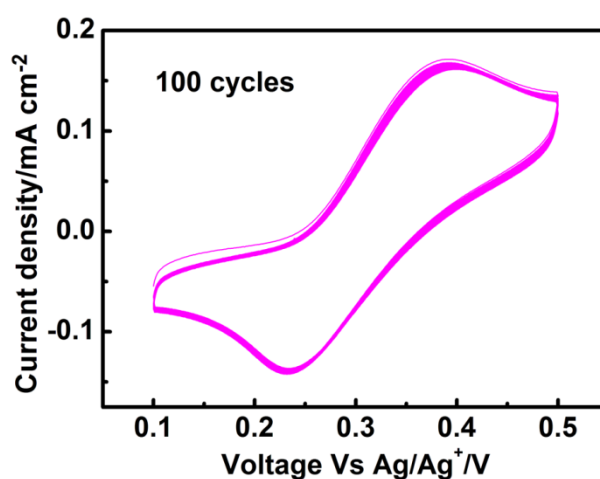

Figure S5. Consecutive cyclic voltammogram of the  $\text{Fe}_3\text{O}_4$  CE for the  $\text{I}^-/\text{I}_3^-$  redox couple

Table S1. EIS parameters of symmetrical cells using Fe<sub>3</sub>O<sub>4</sub> CE prepared with different concentration of reactants.

| Sample                              | $R_s/\Omega \text{ cm}^{-2}$ | $R_{ct}/\Omega \text{ cm}^{-2}$ | $Z_N/\Omega \text{ cm}^{-2}$ |
|-------------------------------------|------------------------------|---------------------------------|------------------------------|
| Fe <sub>3</sub> O <sub>4</sub>      | 8.75                         | 4.30                            | 4.28                         |
| Fe <sub>3</sub> O <sub>4</sub> -0.5 | 7.04                         | 3.08                            | 5.52                         |
| Fe <sub>3</sub> O <sub>4</sub> -0.1 | 8.33                         | 1.67                            | 3.23                         |

### The statistical analysis

For religious comparison, the statistical analysis on comparisons of PCEs for solar cells were also conducted.<sup>2</sup>

As shown in eq.1:

$$Z = \frac{\eta_1 - \eta_0}{\sigma_1/\sqrt{N}} \quad (1)$$

Where  $\eta_1$  is the average PCE based on DSC with Fe<sub>3</sub>O<sub>4</sub> CE,  $\eta_0$  is the average PCE based on DSC with pyrolytic Pt,  $\sigma_1$  is the standard deviation of PCE derived from DSCs with Fe<sub>3</sub>O<sub>4</sub> CE and N is the DSC numbers (Here N=6). Generally, P-value will be obtained by using a simple look-up or an online calculator, which is used to evaluate the statistical significance of the results.

Take DSC based on Fe<sub>3</sub>O<sub>4</sub> for example, the average PCE is 7.65 % with a standard deviation of 0.12 % and the average PCE of DSC with pyrolytic Pt is 6.88 %. By calculation, the Z-score is more than 3.9. According to Z-score table, when Z is equal or greater than 3.9, the areas are 1.0000 to four decimal places. In other words, P-value is 0. That means the PCE of Fe<sub>3</sub>O<sub>4</sub>-based DSC is superior to pyrolytic Pt-based DSC.

The result above gives the further proof on our conclusions about the photovoltaic performance of developed Fe<sub>3</sub>O<sub>4</sub> and Pt CEs.

1. L. S. Zhong, J. S. Hu, H. P. Liang, A. M. Cao, W. G. Song and L. J. Wan, *Advanced Materials*, 2006, 18, 2426-2431.
2. E. J. Lubner and J. M. Buriak, *ACS nano*, 2013, 7, 4708.
